# Supplementary material for: Rare codon content affects the solubility of recombinant proteins in a codon bias-adjusted Escherichia coli strain
Source: PubMed Central journal article supplement (PMC2723077; doi:10.1186/1475-2859-8-41), 2009-07-24
Supplement: 1475-2859-8-41-S1.pdf [file 1475-2859-8-41-S1.pdf]

Additional Table 1

Rare codon frequencies in *Escherichia coli* and model photosynthetic organisms

|                                         | Codon frequency     |              |                     |                     |                     |              |              |
|-----------------------------------------|---------------------|--------------|---------------------|---------------------|---------------------|--------------|--------------|
|                                         | Arg ( <i>arg</i> U) |              | Ile ( <i>ile</i> Y) | Leu ( <i>leu</i> W) | Pro ( <i>pro</i> L) | Ser          | Thr          |
|                                         | AGA                 | AGG          | AUA                 | CUA                 | CCC                 | UCA          | ACA          |
| <i>Escherichia coli</i>                 | 2.4 (5.10)          | 2.1 (4.12)   | 5.0 (7.15)          | 3.4 (2.81)          | 2.4 (5.93)          | 6.1 (10.65)  | 6.1 (11.38)  |
| <b>Protists</b>                         |                     |              |                     |                     |                     |              |              |
| <i>Chlamydomonas reinhardtii</i>        | 0.7 (1.24)          | 2.7 (4.79)   | 1.1 (3.08)          | 2.6 (2.90)          | 29.5 (46.53)        | 3.2 (4.89)   | 4.1 (7.75)   |
| <i>Synechococcus elongatus</i> PCC 7942 | 1.6 (2.36)          | 1.0 (1.48)   | 1.0 (1.84)          | 11.2 (9.13)         | 18.3 (33.52)        | 5.6 (9.33)   | 7.2 (13.85)  |
| <b>Plants</b>                           |                     |              |                     |                     |                     |              |              |
| <i>Arabidopsis thaliana</i>             | 19.0 (35.19)        | 11.0 (20.37) | 12.6 (23.95)        | 9.9 (10.59)         | 5.3 (10.88)         | 18.3 (20.49) | 15.7 (30.66) |
| <i>Pisum sativum</i>                    | 16.6 (35.24)        | 11.0 (23.35) | 13.3 (23.92)        | 8.8 (9.85)          | 6.3 (12.40)         | 17.9 (22.80) | 17.5 (31.99) |
| <i>Nicotiana tabacum</i>                | 16.0 (32.92)        | 12.2 (25.10) | 14.0 (25.13)        | 9.4 (10.26)         | 6.6 (13.17)         | 17.6 (23.04) | 17.4 (33.53) |
| <i>Solanum lycopersicum</i>             | 16.4 (35.04)        | 11.9 (25.43) | 14.0 (24.91)        | 10.0 (10.50)        | 5.7 (11.70)         | 20.7 (25.27) | 17.9 (35.10) |
| <i>Lemna gibba</i>                      | 15.1 (25.21)        | 11.8 (19.70) | 4.7 (13.39)         | 3.2 (4.42)          | 25.5 (35.32)        | 9.2 (9.24)   | 5.4 (12.05)  |
| <i>Medicago truncatula</i>              | 17.7 (35.40)        | 12.1 (24.20) | 15.5 (26.45)        | 10.2 (10.54)        | 5.5 (12.22)         | 21.2 (25.00) | 17.9 (35.51) |
| <i>Zea mays</i> L.                      | 8.8 (15.22)         | 14.8 (26.61) | 8.4 (18.71)         | 7.3 (7.86)          | 13.5 (24.24)        | 11.0 (14.80) | 10.5 (21.52) |
| <i>Oryza sativa</i>                     | 10.5 (15.09)        | 16.0 (22.99) | 8.8 (20.76)         | 7.7 (8.51)          | 12.1 (20.90)        | 12.4 (15.80) | 11.6 (23.92) |

Codon frequencies (per 1000) were extracted from the Kazusa codon usage database (<http://www.kazusa.or.jp/codon/>).

Values in parenthesis indicate the percentage of each specific codon among the codons for the amino acid stated.
