# Supplementary material for: Rare codon content affects the solubility of recombinant proteins in a codon bias-adjusted Escherichia coli strain
Source: PubMed Central journal article supplement (PMC2723077; doi:10.1186/1475-2859-8-41), 2009-07-24

### Control

### L-RIL Group

### H-RIL Group

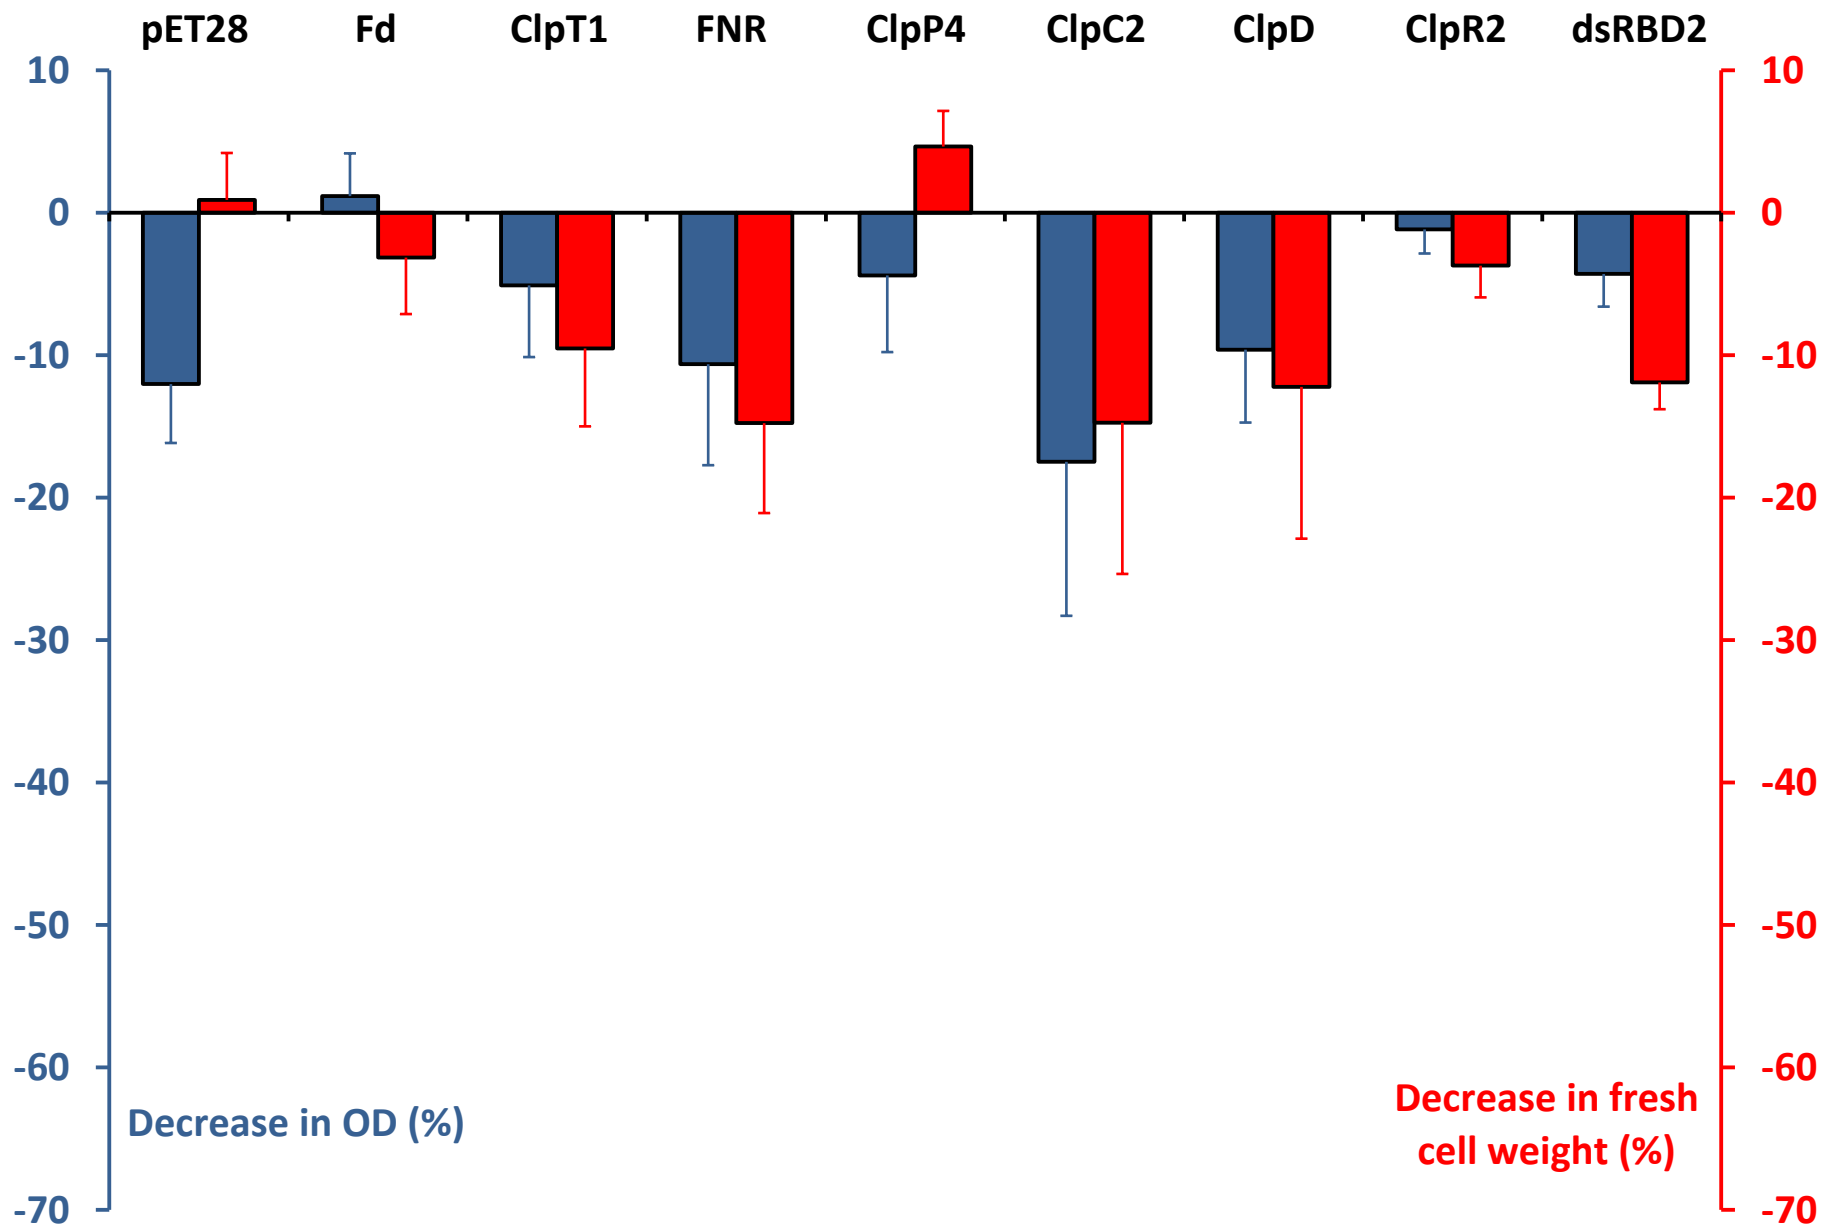

Supplement: 1475-2859-8-41-S4.pdf [file 1475-2859-8-41-S4.pdf]
